# Supplementary material for: Abundant protein phosphorylation potentially regulates Arabidopsis anther development
Source: PubMed Central journal article supplement (PMC5014169; doi:10.1093/jxb/erw293), 2016-08-16

## **Abundant Protein Phosphorylation Potentially Regulates Arabidopsis Anther Development**

Juanying Ye, Zaibao Zhang, Chenjiang You, Xumin Zhang, Jianan Lu, Hong Ma\*

<sup>1</sup>State Key Laboratory of Genetic Engineering and Collaborative Innovation Center of Genetics and Development, Institute of Plant Biology, School of Life Sciences, Fudan University, Shanghai 200433, China

### **Supplemental Figure legends.**

**Figure S1.** Mapman analysis of total identified proteins (including phosphoproteins). Only functional bins with  $P < 1.0 \times 10^{-2}$  are presented.

**Figure S2.** Overlap of proteomic and phosphoproteomic analyses in anther phase I and II. (a) Overlap between phosphoproteome (4-7phos) and proteome (4-7proteome) at anther stage 4-7 (phase I); (b) Overlap between phosphoproteome (8-12phos) and proteome (8-12proteome) at anther stage 8-12 (phase II).

**Figure S3.** The enriched MapMan bins (bin numbers and bin names) of identified phosphoproteins (proteins identified in proteomic analysis were set as background) for anther phase I (a) and II (b). Only functional bins with  $P < 1.0 \times 10^{-2}$  for identified proteins are presented.

**Figure S4.** The enriched MapMan bins (bin numbers and bin names) of proteomic datasets for anther phase I and II. Only functional bins with  $P < 1.0 \times 10^{-2}$  for identified proteins are presented.

**Figure S5.** Phosphorylation motifs of phosphoSer and phosphoThr predicted by Motif-X.

**Figure S6.** The kinase-substrate network extracted from phosphoproteome of anther phase II.

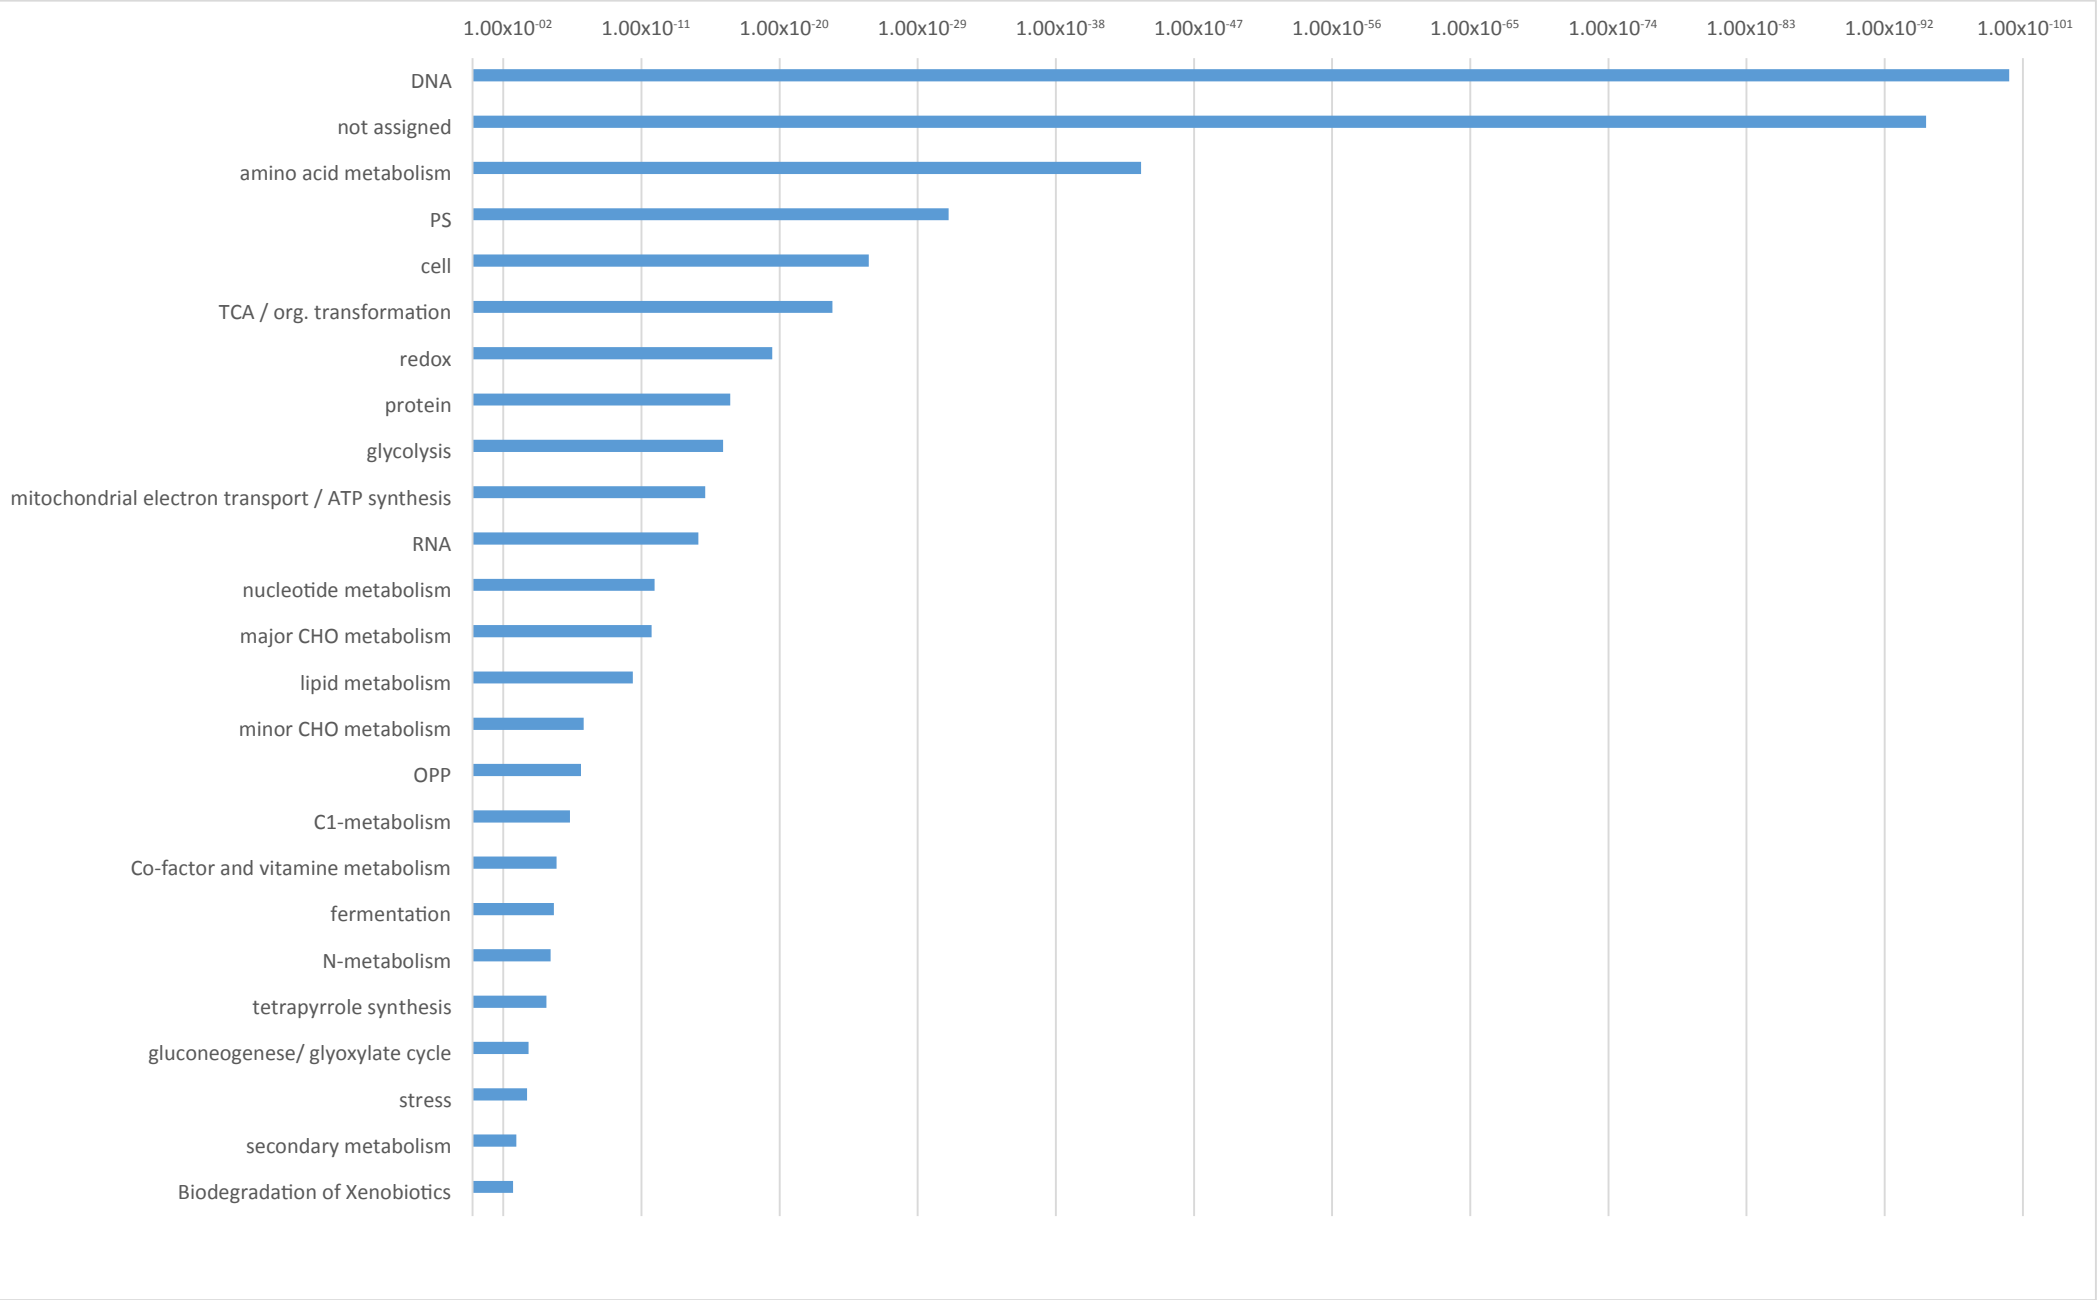

a

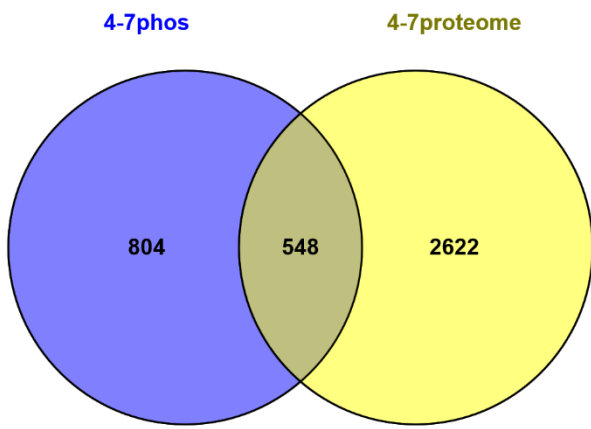

b

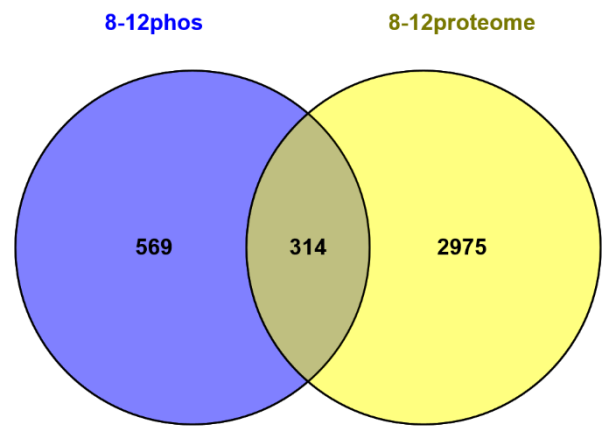

a

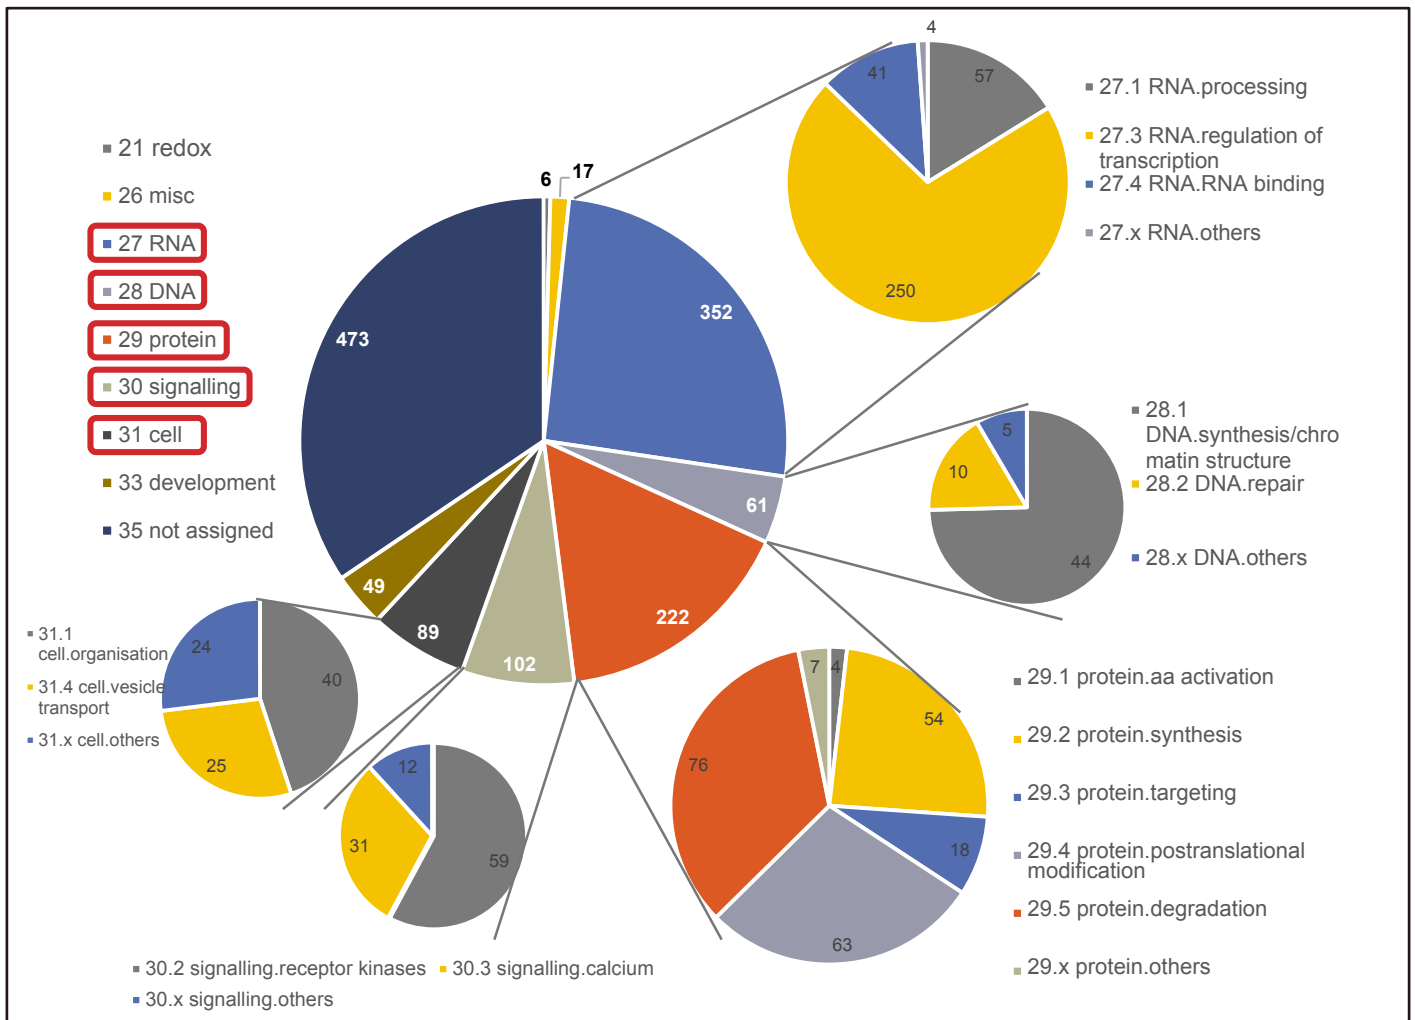

b

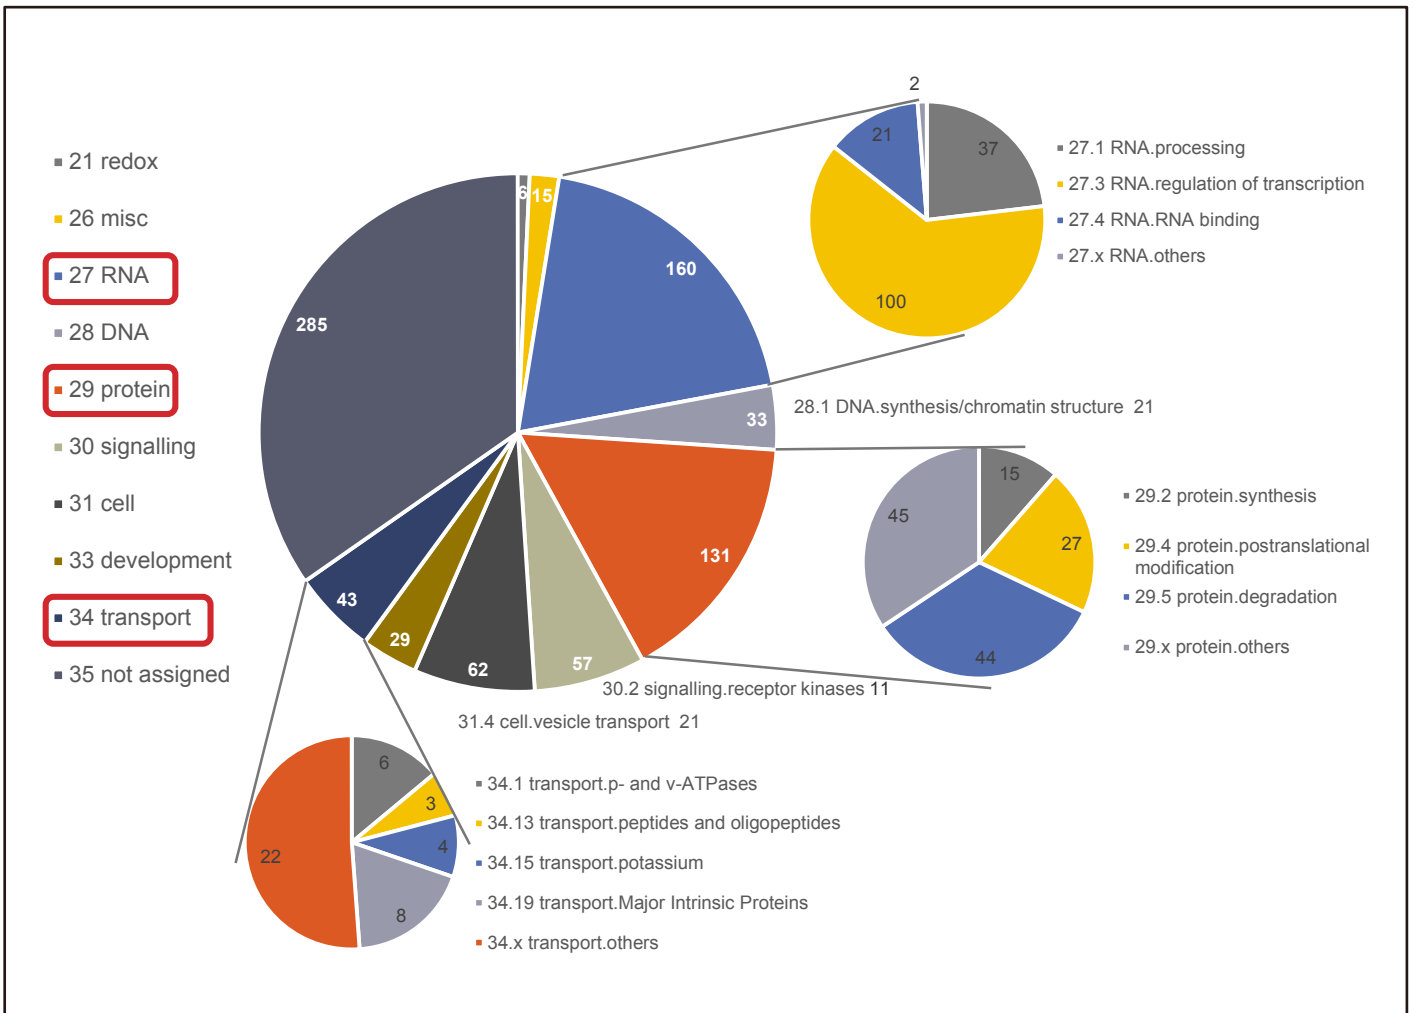

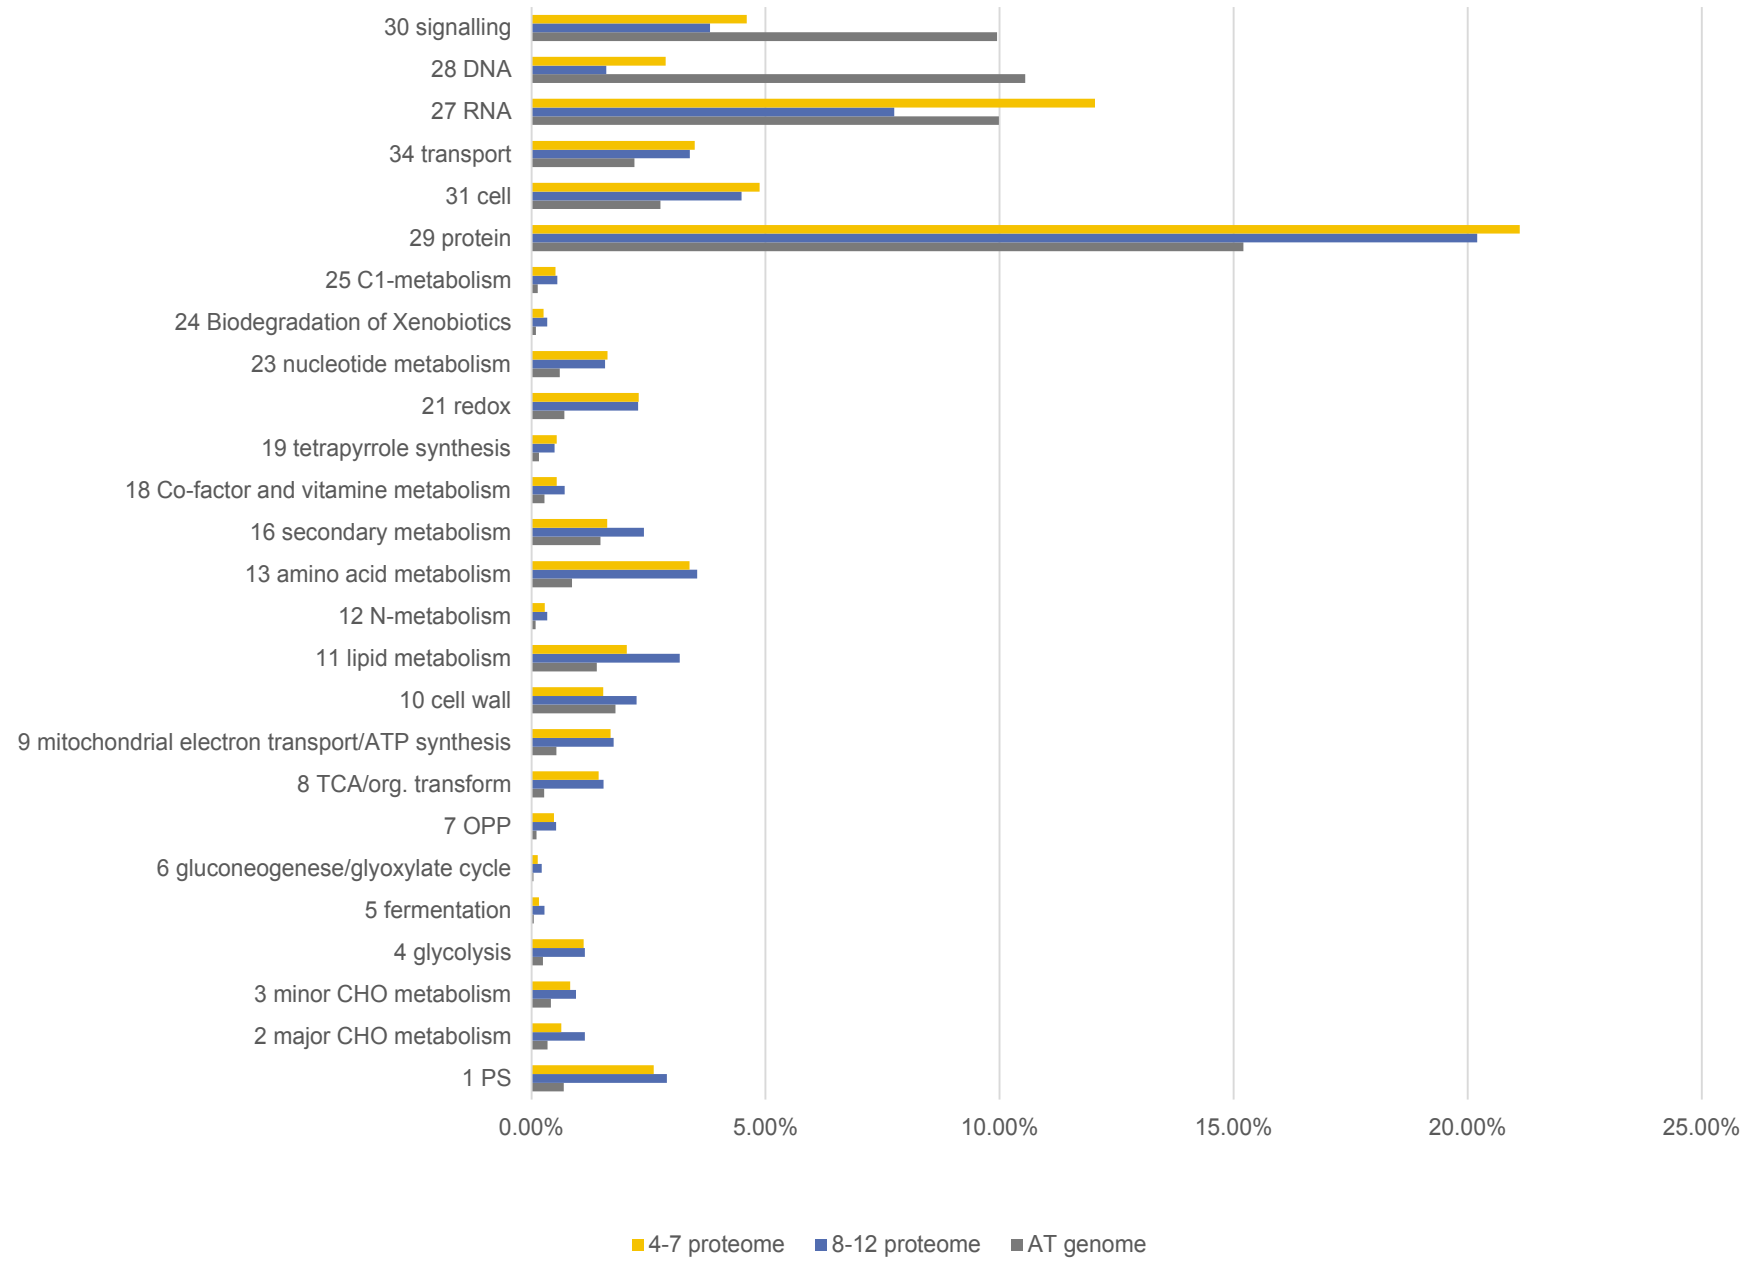

Motif 1-15

Motif 15-30

Motif 30-45

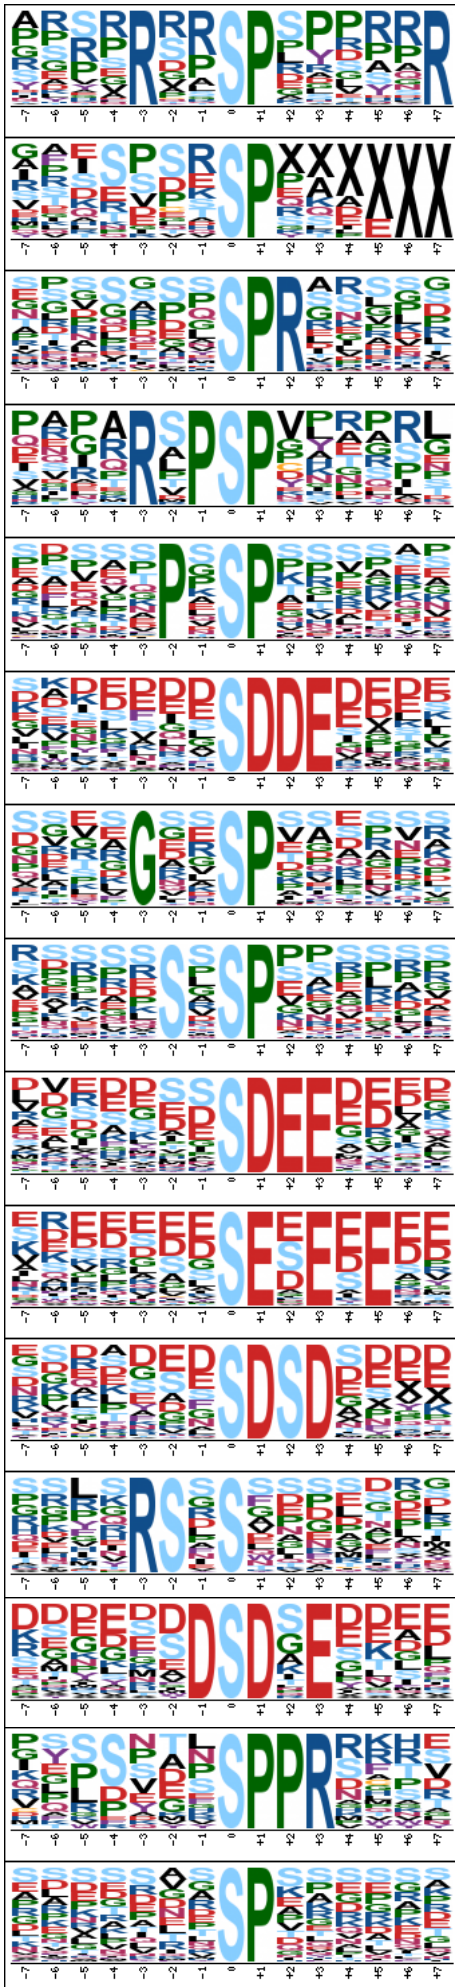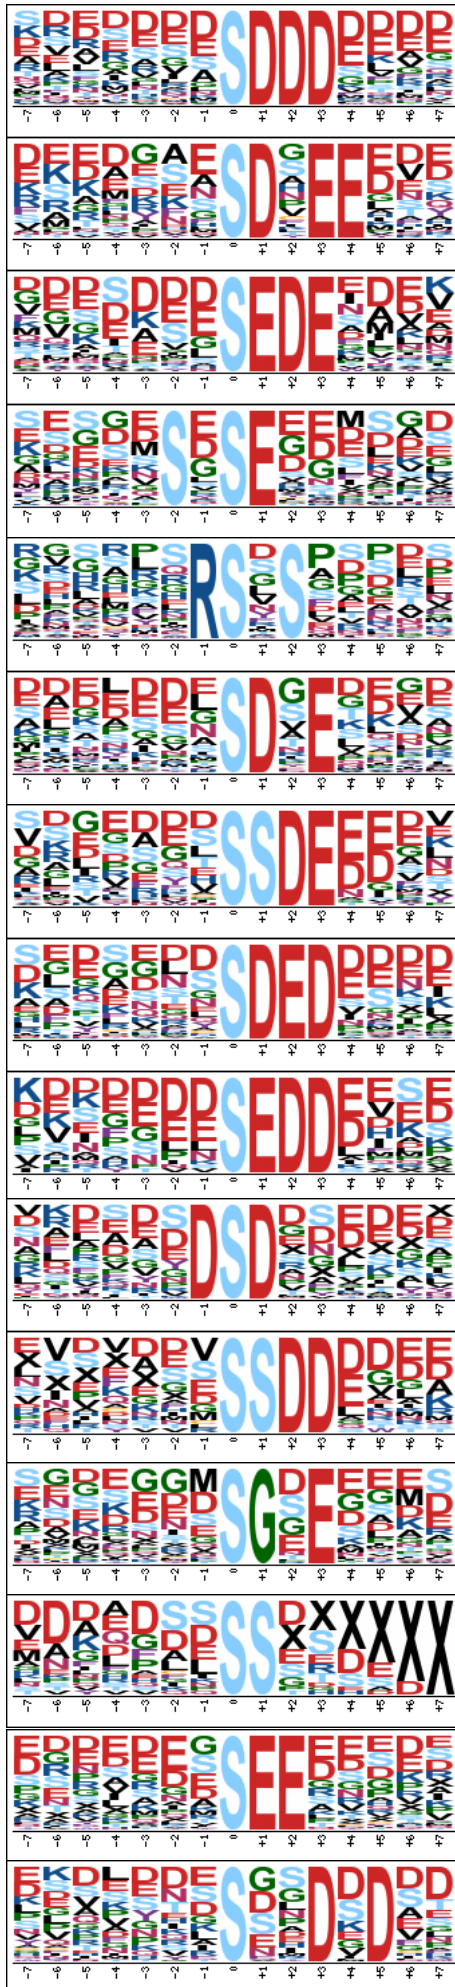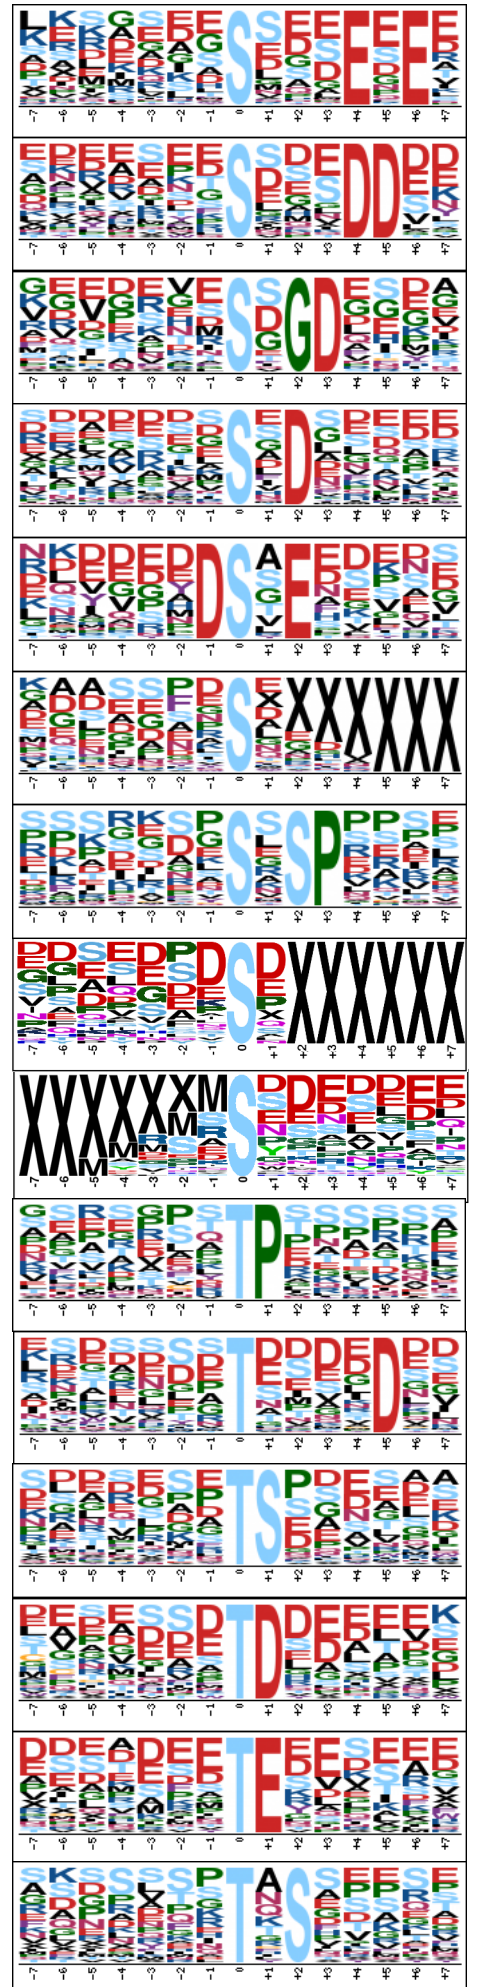

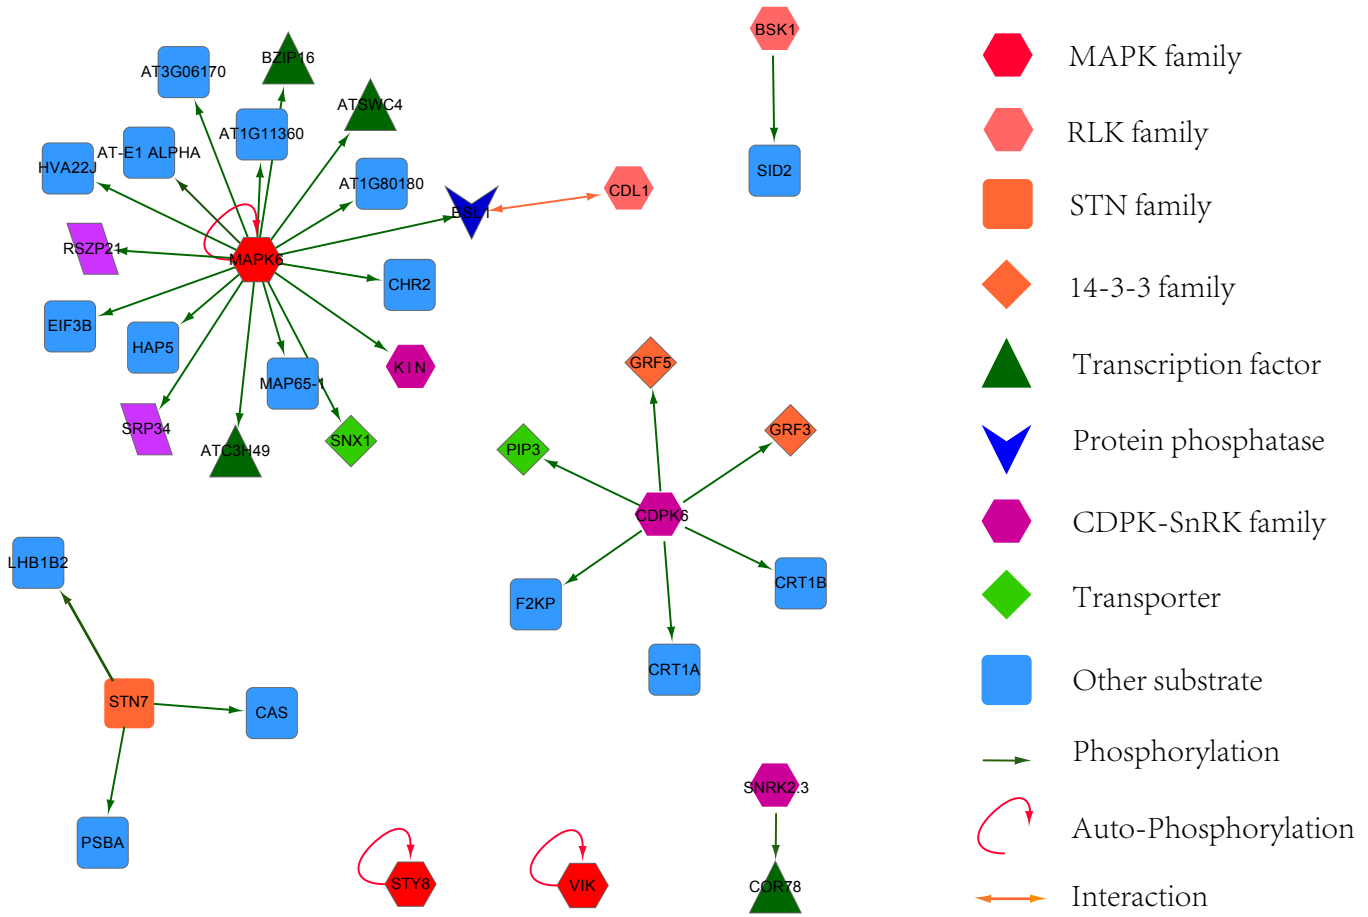

Supplement: supp_erw293_supplementary_figures_S1_S6.pdf [file supp_erw293_supplementary_figures_S1_S6.pdf]
